# Supplementary material
Source: PubMed Central journal article supplement (PMC7854286)
Supplement: mmc1.pdf [file mmc1.pdf]

**YMTHE, Volume 29**

## **Supplemental Information**

### **Oncolytic Virus Therapy with HSV-1**

#### **for Hematological Malignancies**

**Ryo Ishino, Yumi Kawase, Toshio Kitawaki, Naoshi Sugimoto, Maki Oku, Shumpei Uchida, Osamu Imataki, Akihito Matsuoka, Teruhisa Taoka, Kimihiro Kawakami, Toin H. van Kuppevelt, Tomoki Todo, Akifumi Takaori-Kondo, and Norimitsu Kadowaki**

# Figure S1

## Myeloid

### THP-1

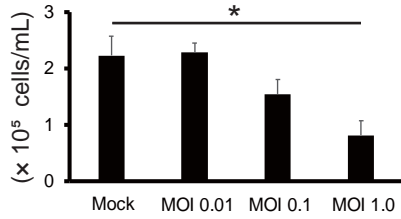

### SET-2

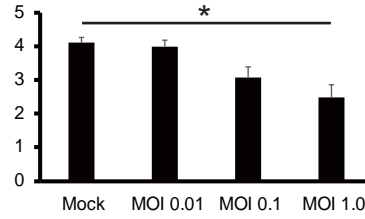

### SKM-1

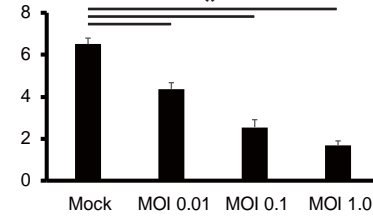

### MEG-01

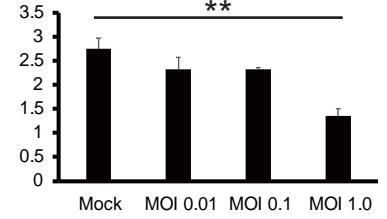

### HEL

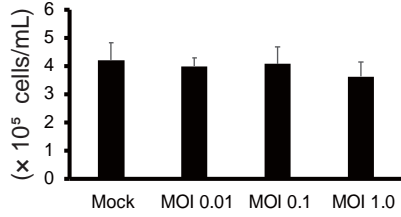

### HL-60

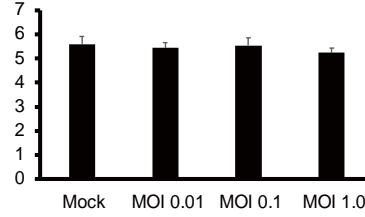

### CHRF-288-11

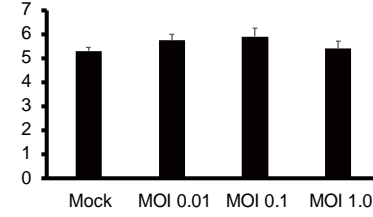

## T cell

### ATL-43T

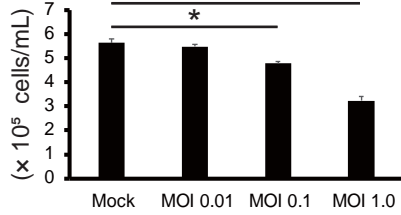

### SYK-11L(+)

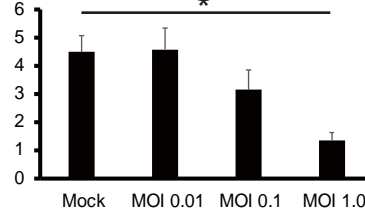

### ED-40515(+)

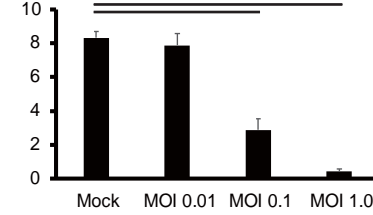

### MT-2

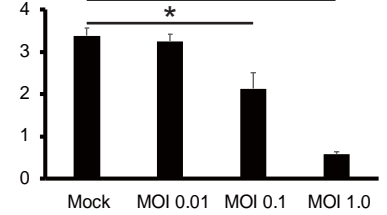

### HuT 102

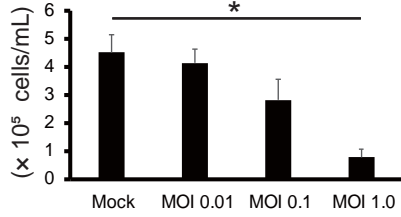

### SR-786

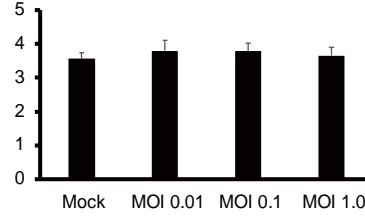

### SU-DHL-1

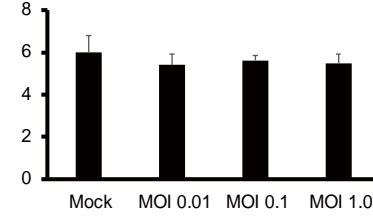

## B cell

### RPMI 8226

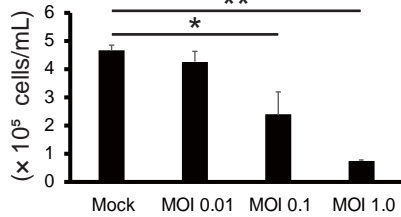

### KMS-12-BM

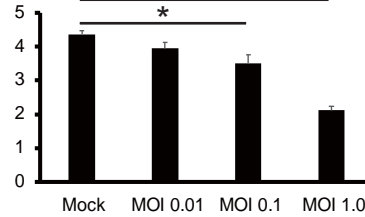

### MM.1S

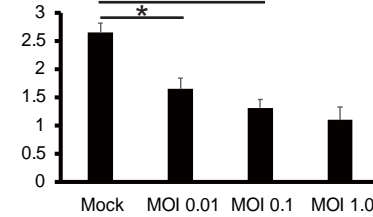

### Raji

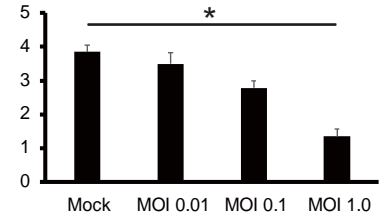

### KM-H2

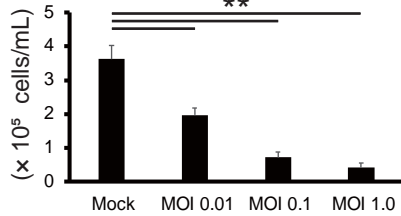

### NCI-H929

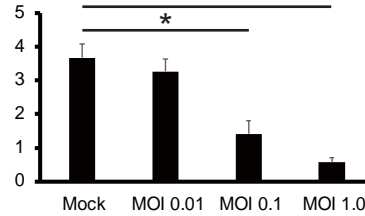

### U266

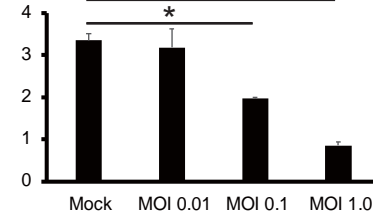

### FL-318

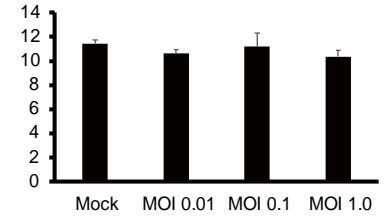

### KIS-1

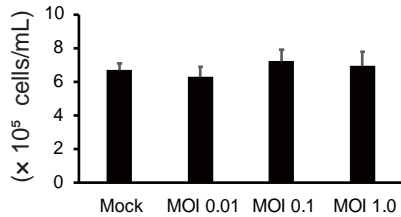

**Figure S1 related to Figure 1. T-01 kills human cell lines derived from various lineages of hematological malignancies.**

Human hematological tumor cell lines of myeloid, T cell, and B cell lineages were treated with mock or T-01 (MOI 0.01, 0.1, and 1.0). After 3 days, the number of viable cells was counted. The data are shown as the mean  $\pm$  SE of 3 independent experiments. Statistical analysis was conducted using non-repeated measures ANOVA followed by Dunnett' s test. \* $P < 0.05$ , \*\* $P < 0.01$ .

Figure S2

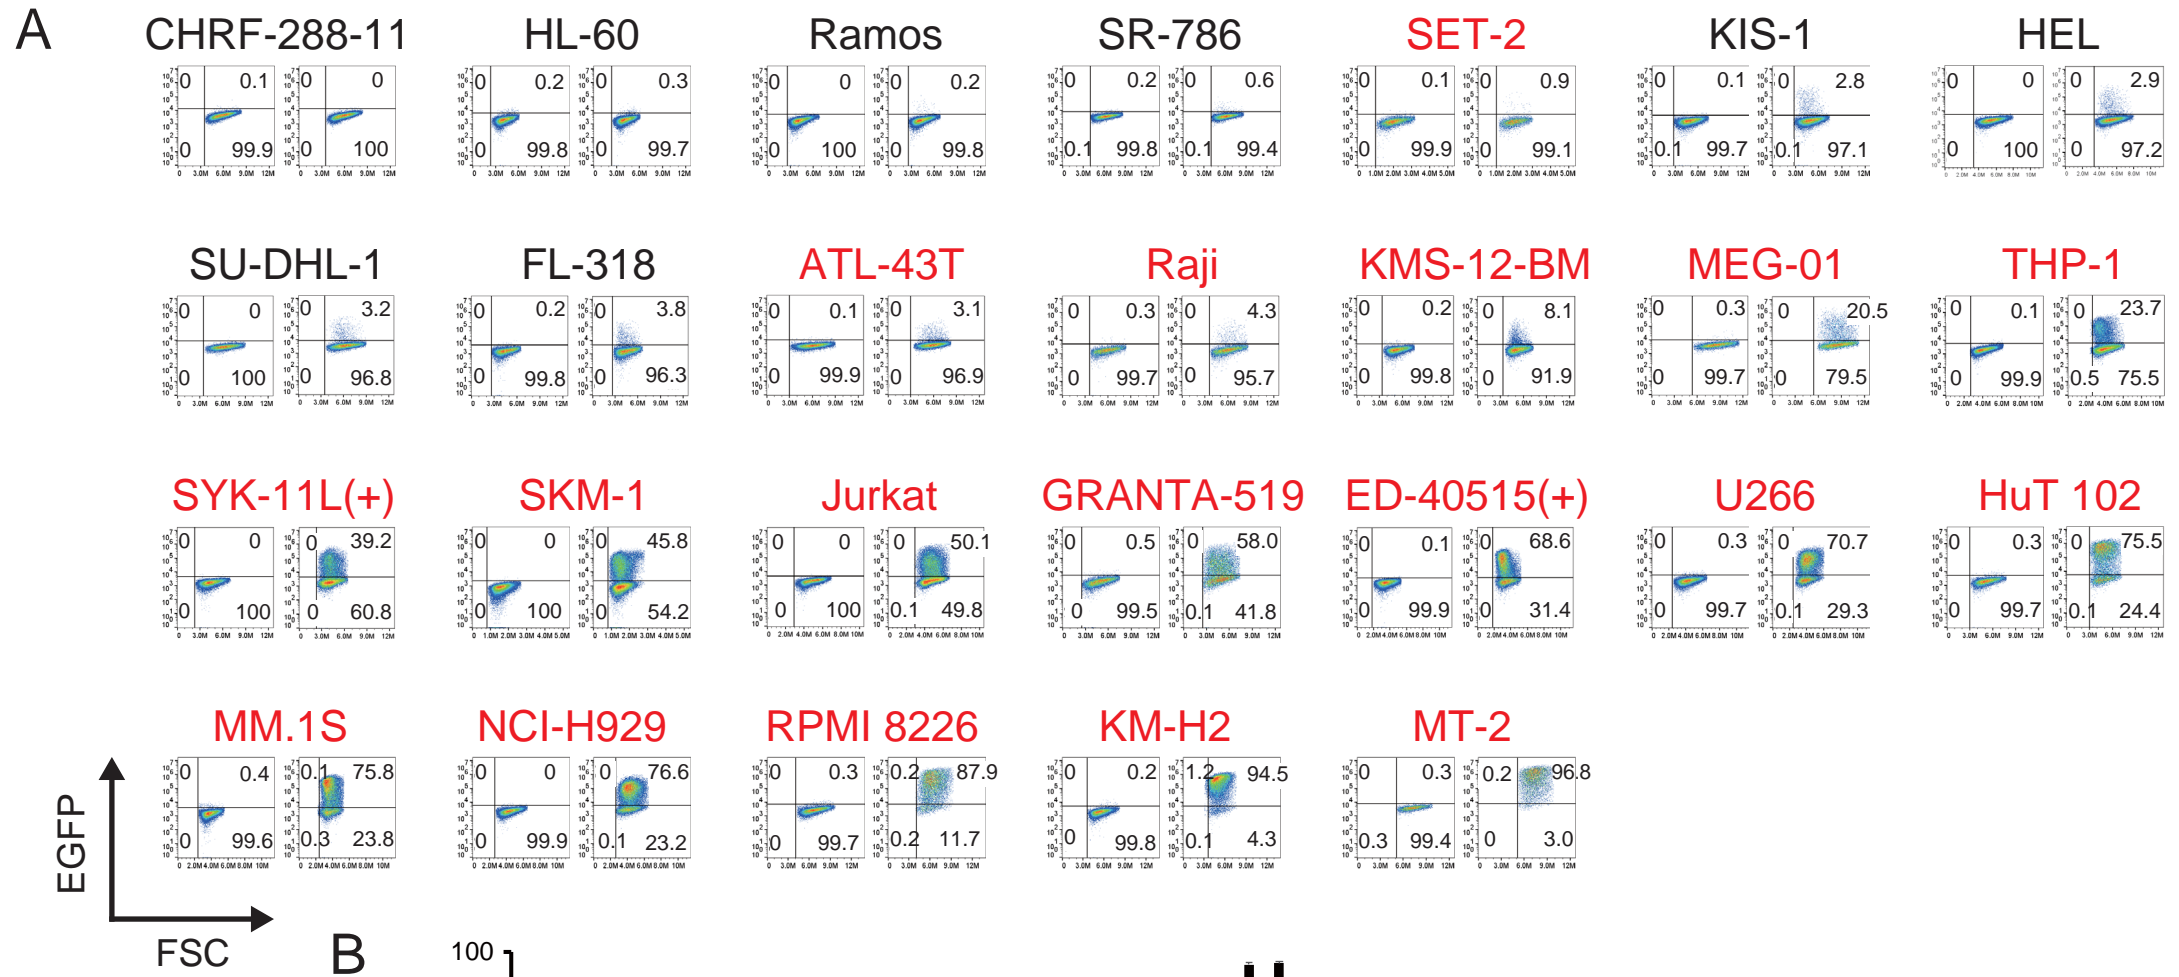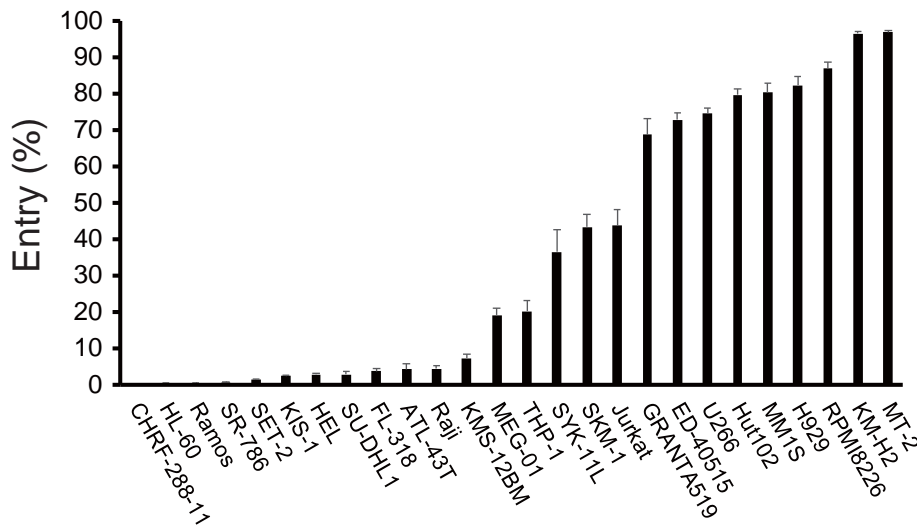

## Figure S2C

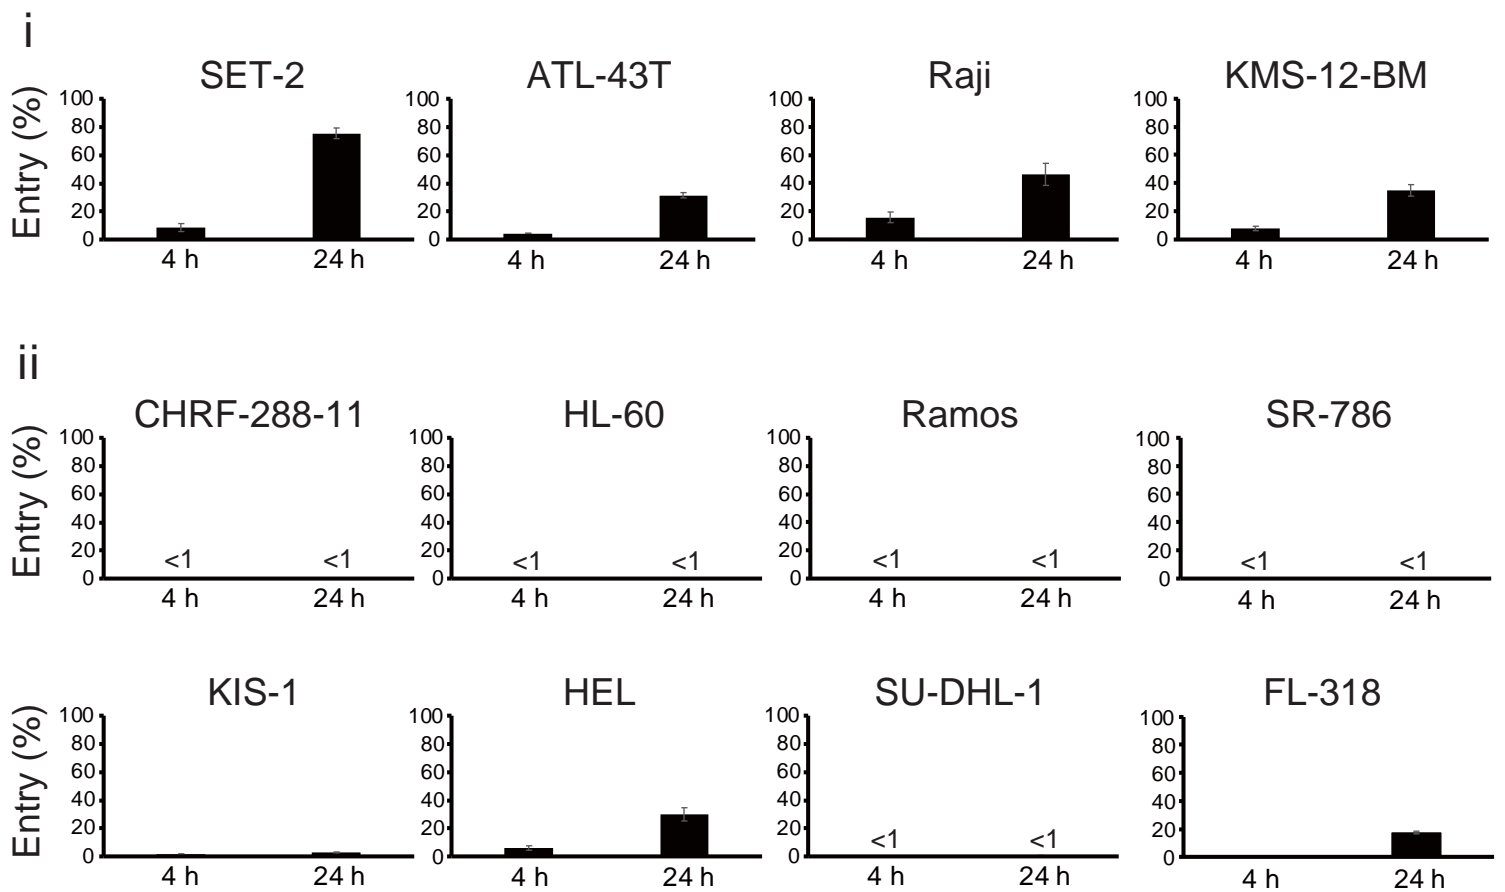

**Figure S2 related to Figure 3. The degrees of viral entry are highly variable among the cell lines.**

(A) Cell lines were treated with T-GFP (MOI 1.0) for 4 hours. The degrees of viral entry are shown by flow cytometry with forward scatter versus EGFP. The left and right panels of each cell line indicate cells without and with T-GFP, respectively. The percentages of EGFP-positive and negative cells are indicated on the plot. The cell lines susceptible to T-01 are labeled with red.

(B) A graph showing the percentages of cells with viral entry as detected by EGFP positivity shown in (A). The data are shown as the mean  $\pm$  SE of 3 independent experiments.

(C) Graphs showing the percentages of cells with viral entry as detected by EGFP positivity at 4 and 24 hours. The cell lines with low levels of viral entry at 4 hours are shown. (i) T-01-susceptible cell lines, (ii) T-01-resistant cell lines. The data are shown as the mean  $\pm$  SE of 3 independent experiments.

Figure S3

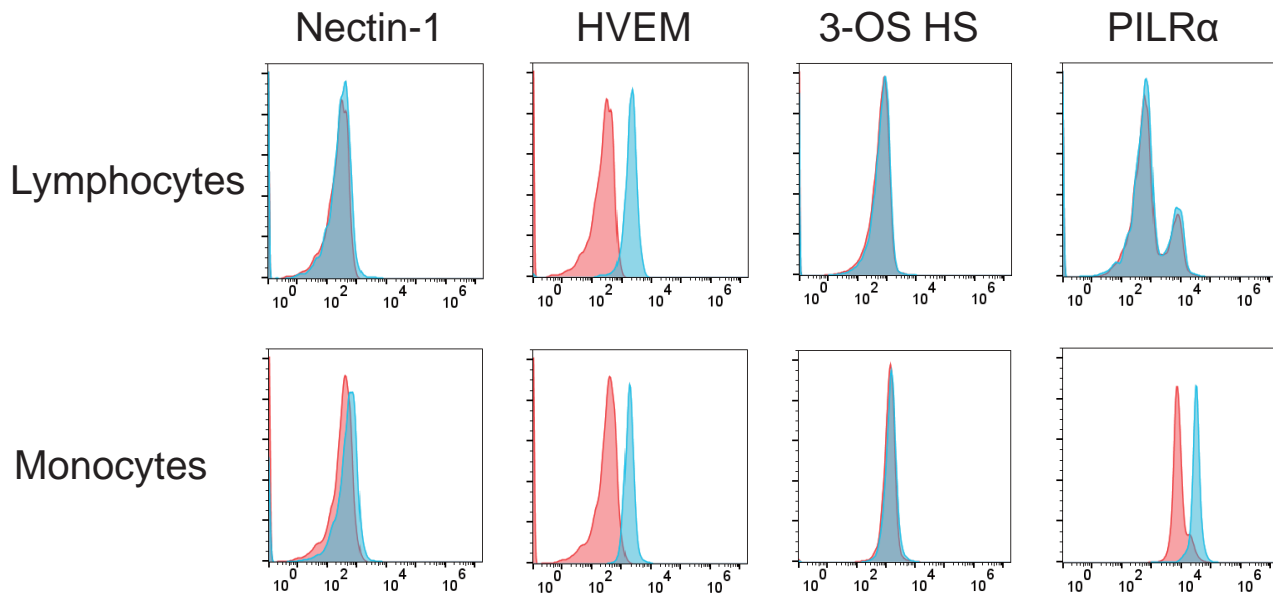

**Figure S3 related to Figure 3. Expression of nectin-1, HVEM, 3-OS HS, and PILR $\alpha$  on lymphocytes and monocytes in human peripheral blood.**

Lymphocytes and monocytes were gated based on forward and side scatters. Red histograms represent cells stained with isotype-matched control mAbs. Anti-heparan sulfate antibody HS4C3 was omitted for the negative control of 3-OS HS. The data are representative of 3 independent experiments.

# Figure S4A Nectin-1 expression

## Myeloid

THP-1

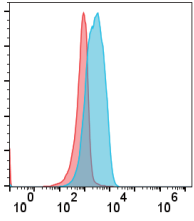

SET-2

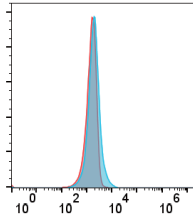

SKM-1

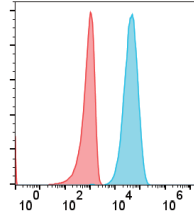

MEG-01

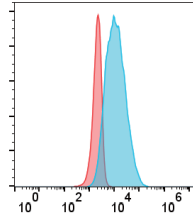

HEL

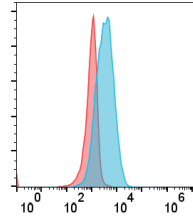

HL-60

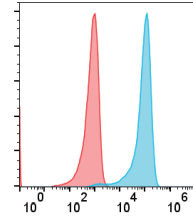

CHRF-288-11

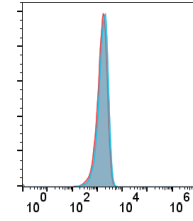

## T cell

Jurkat

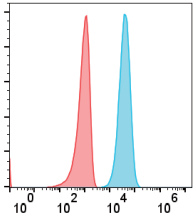

ATL-43T

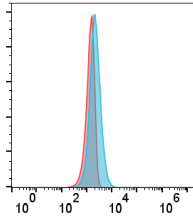

SYK-11L(+)

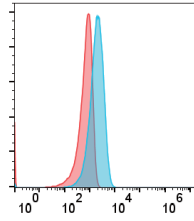

ED-40515(+)

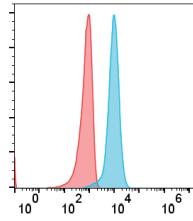

MT-2

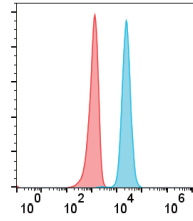

HuT 102

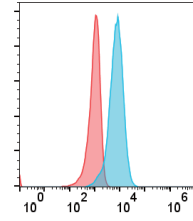

SU-DHL-1

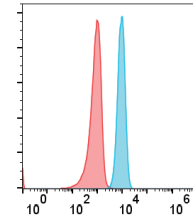

SR-786

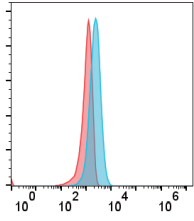

## B cell

GRANTA-519

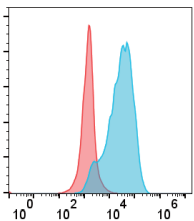

RPMI 8226

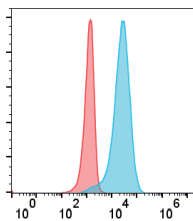

KMS-12-BM

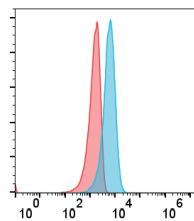

MM.1S

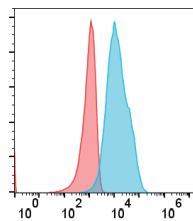

Raji

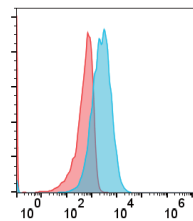

KM-H2

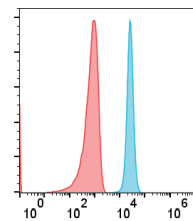

NCI-H929

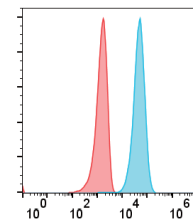

U266

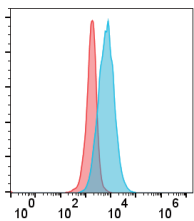

FL-318

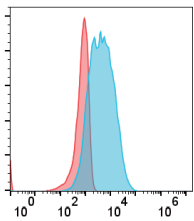

Ramos

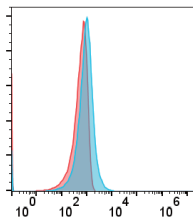

KIS-1

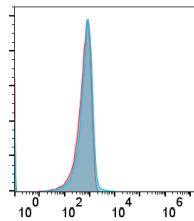

**Figure S4 related to Figure 3. Expression of nectin-1 (A), HVEM (B), and 3-OS HS (C) on the cell lines.**

(A) Red histograms represent cells stained with isotype-matched control mAbs. The cell lines susceptible to T-01 are labeled with red. The data are representative of 3 independent experiments.

# Figure S4B HVEM expression

## Myeloid

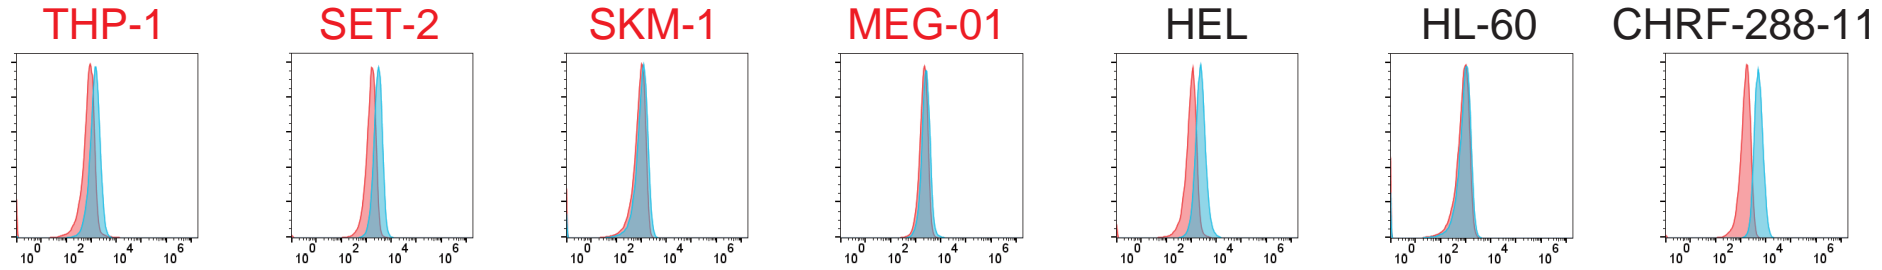

## T cell

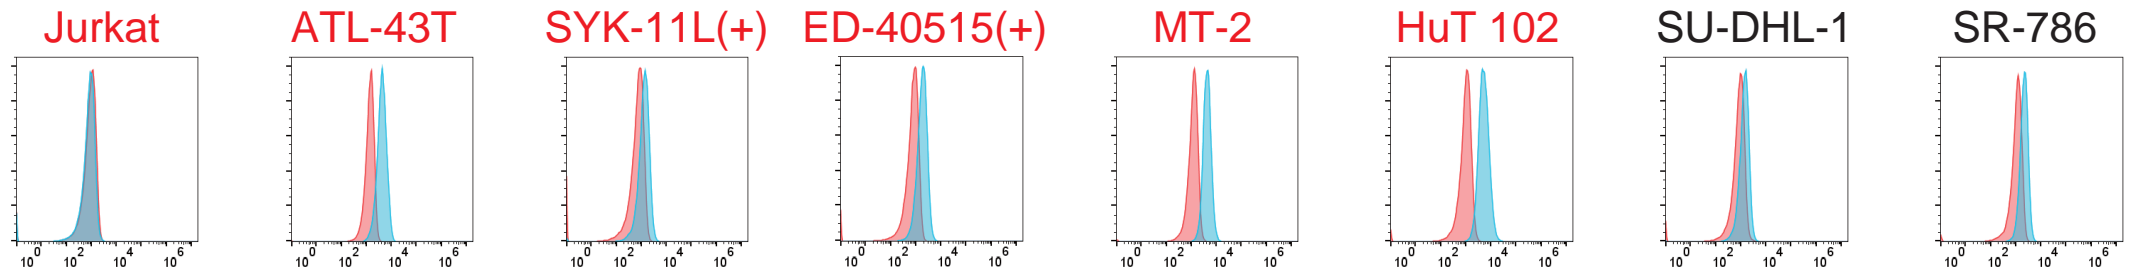

## B cell

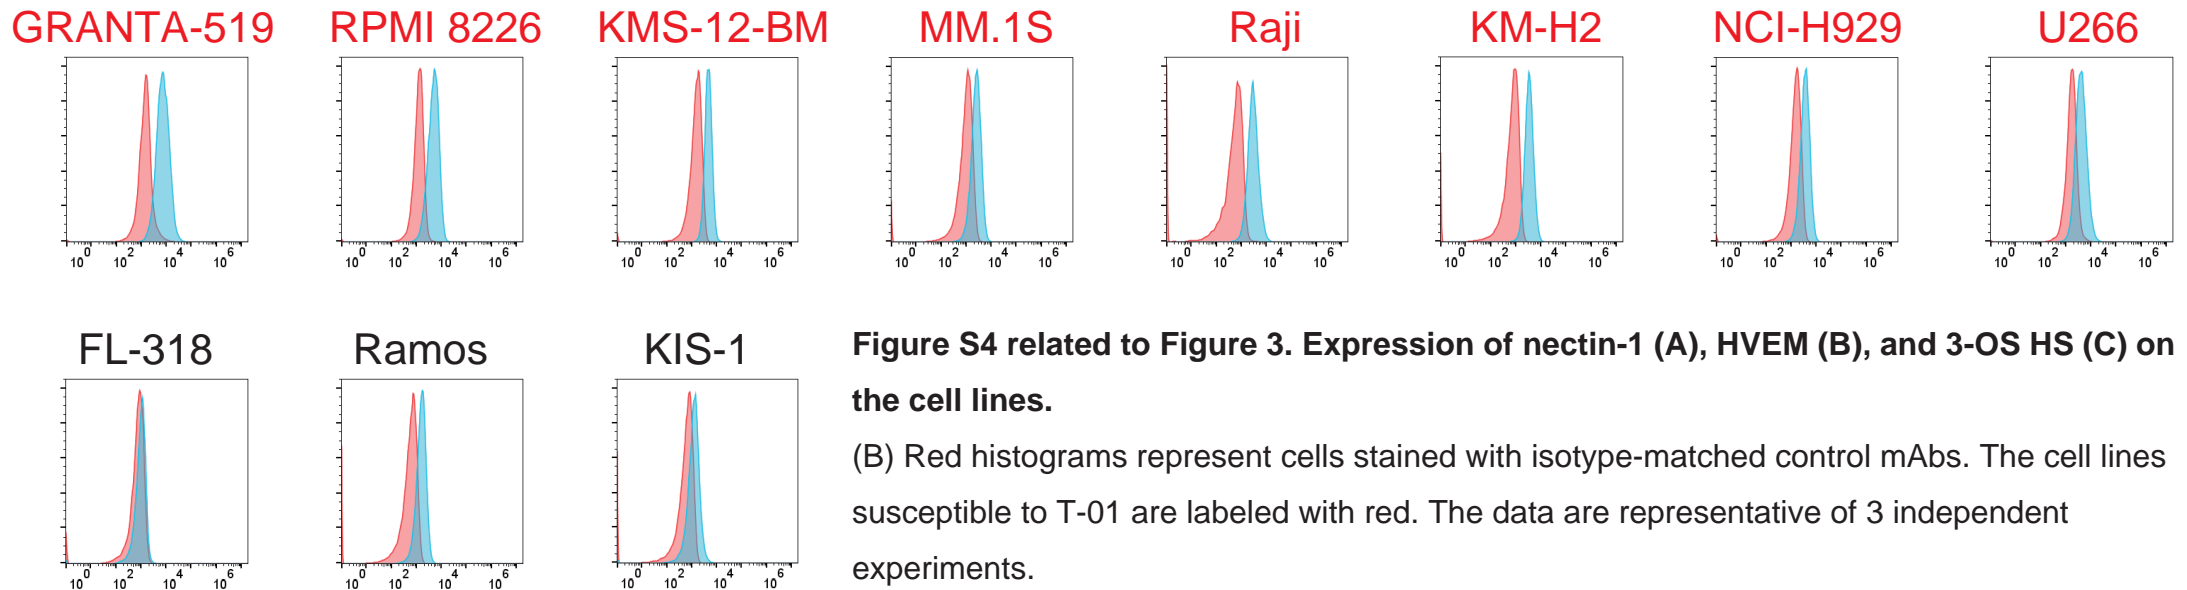

**Figure S4 related to Figure 3. Expression of nectin-1 (A), HVEM (B), and 3-OS HS (C) on the cell lines.**

(B) Red histograms represent cells stained with isotype-matched control mAbs. The cell lines susceptible to T-01 are labeled with red. The data are representative of 3 independent experiments.

# Figure S4C 3-OS HS expression

## Myeloid

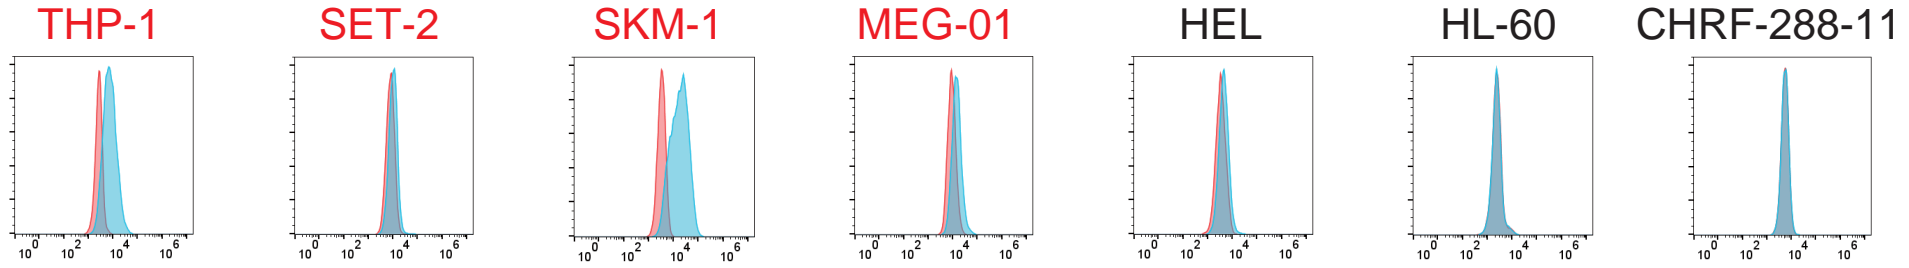

## T cell

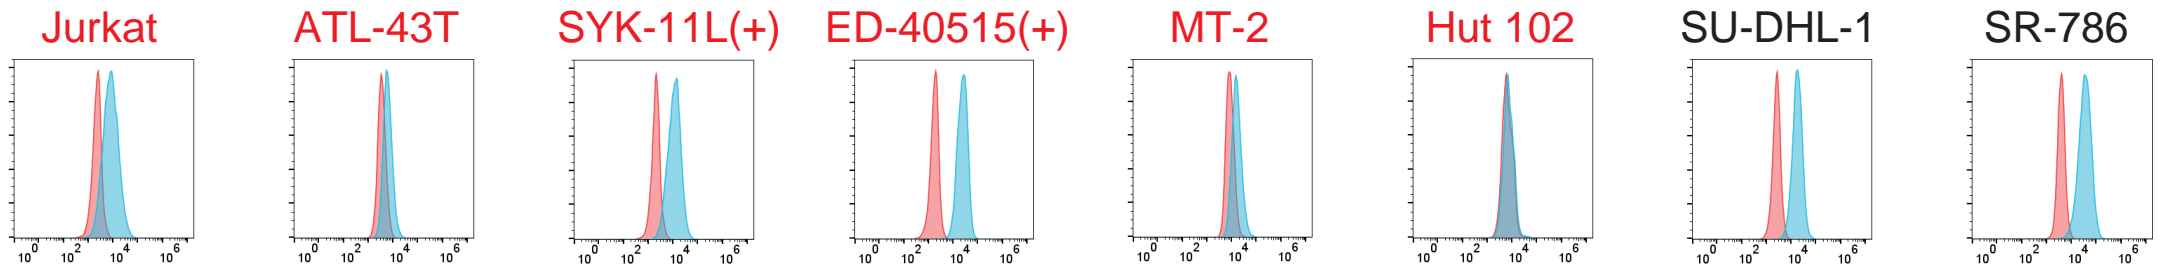

## B cell

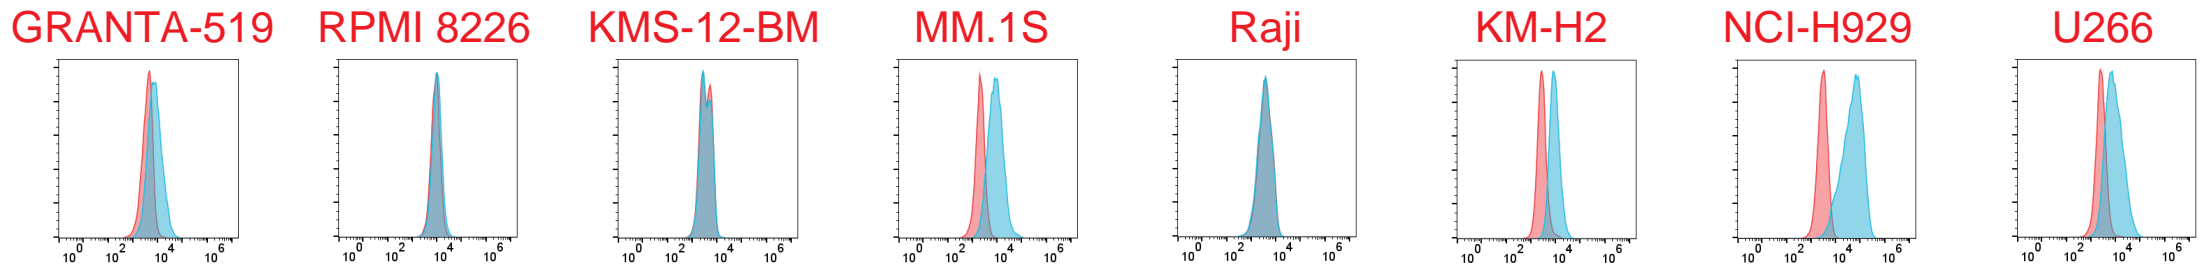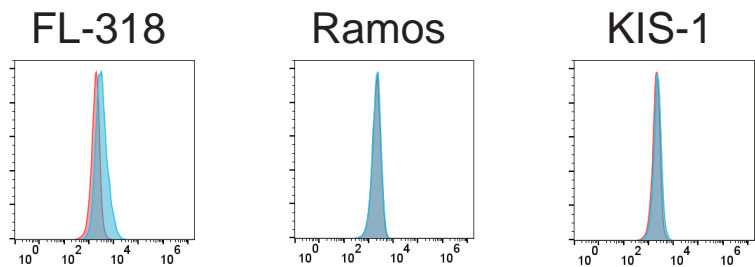

**Figure S4 related to Figure 3. Expression of nectin-1 (A), HVEM (B), and 3-OS HS (C) on the cell lines.**

(C) Red histograms represent cells stained by omitting anti-heparan sulfate antibody HS4C3. The cell lines susceptible to T-01 are labeled with red. The data are representative of 3 independent experiments.



Figure S5

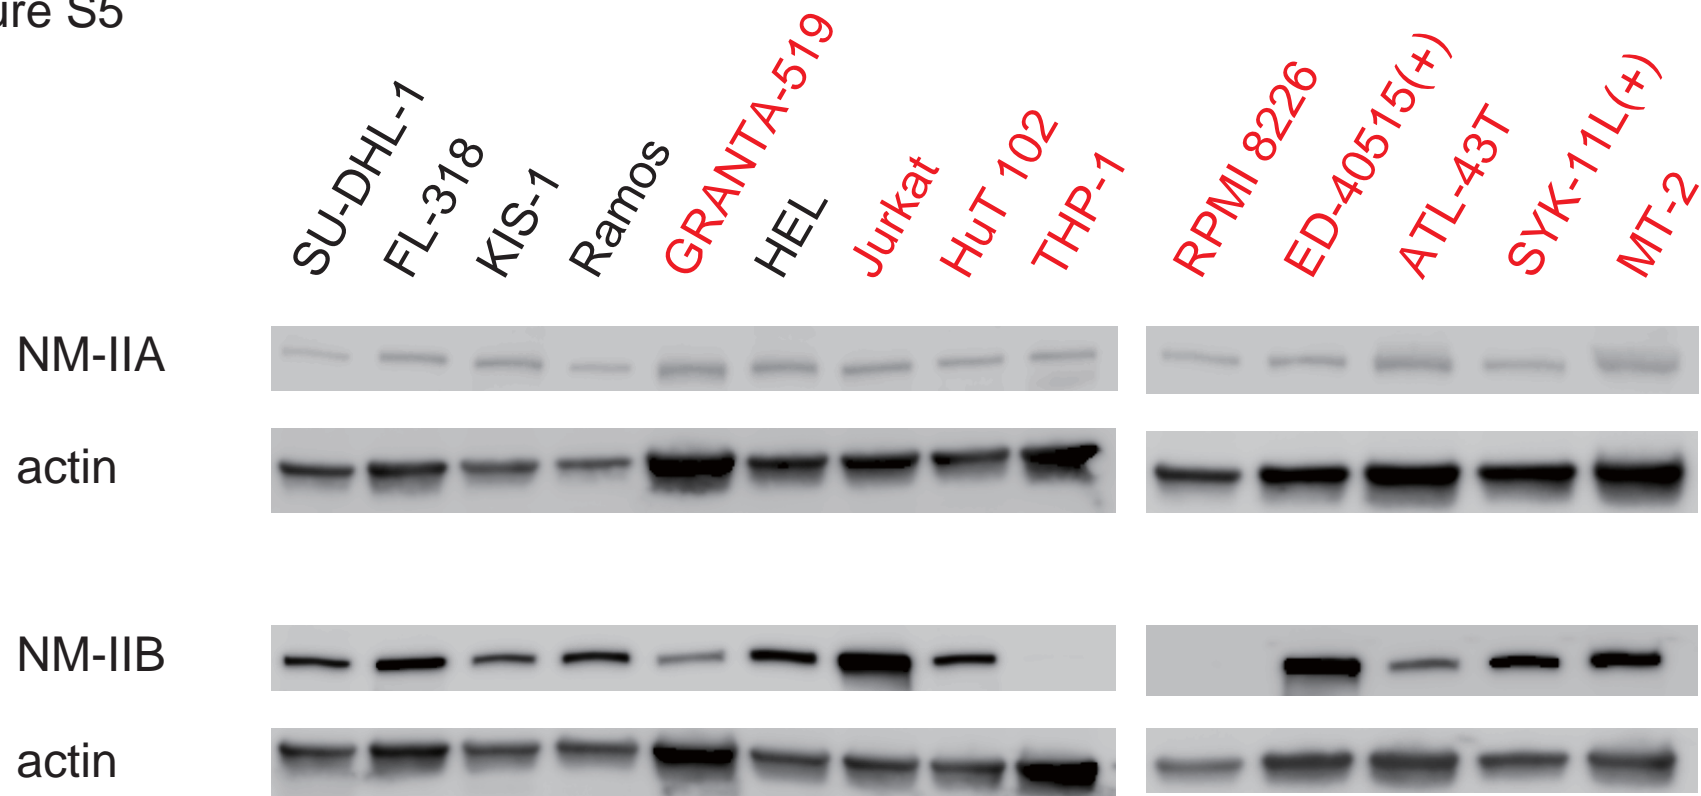

**Figure S5. Expression of NMHC-IIA and IIB in the cell lines.**

(A) NMHC-IIA (NM-IIA), (B) NMHC-IIB (NM-IIB), and  $\beta$ -actin in cell extracts were detected by western blotting. The cell lines susceptible to T-01 are labeled with red. The data are representative of 3 independent experiments.

# Figure S6

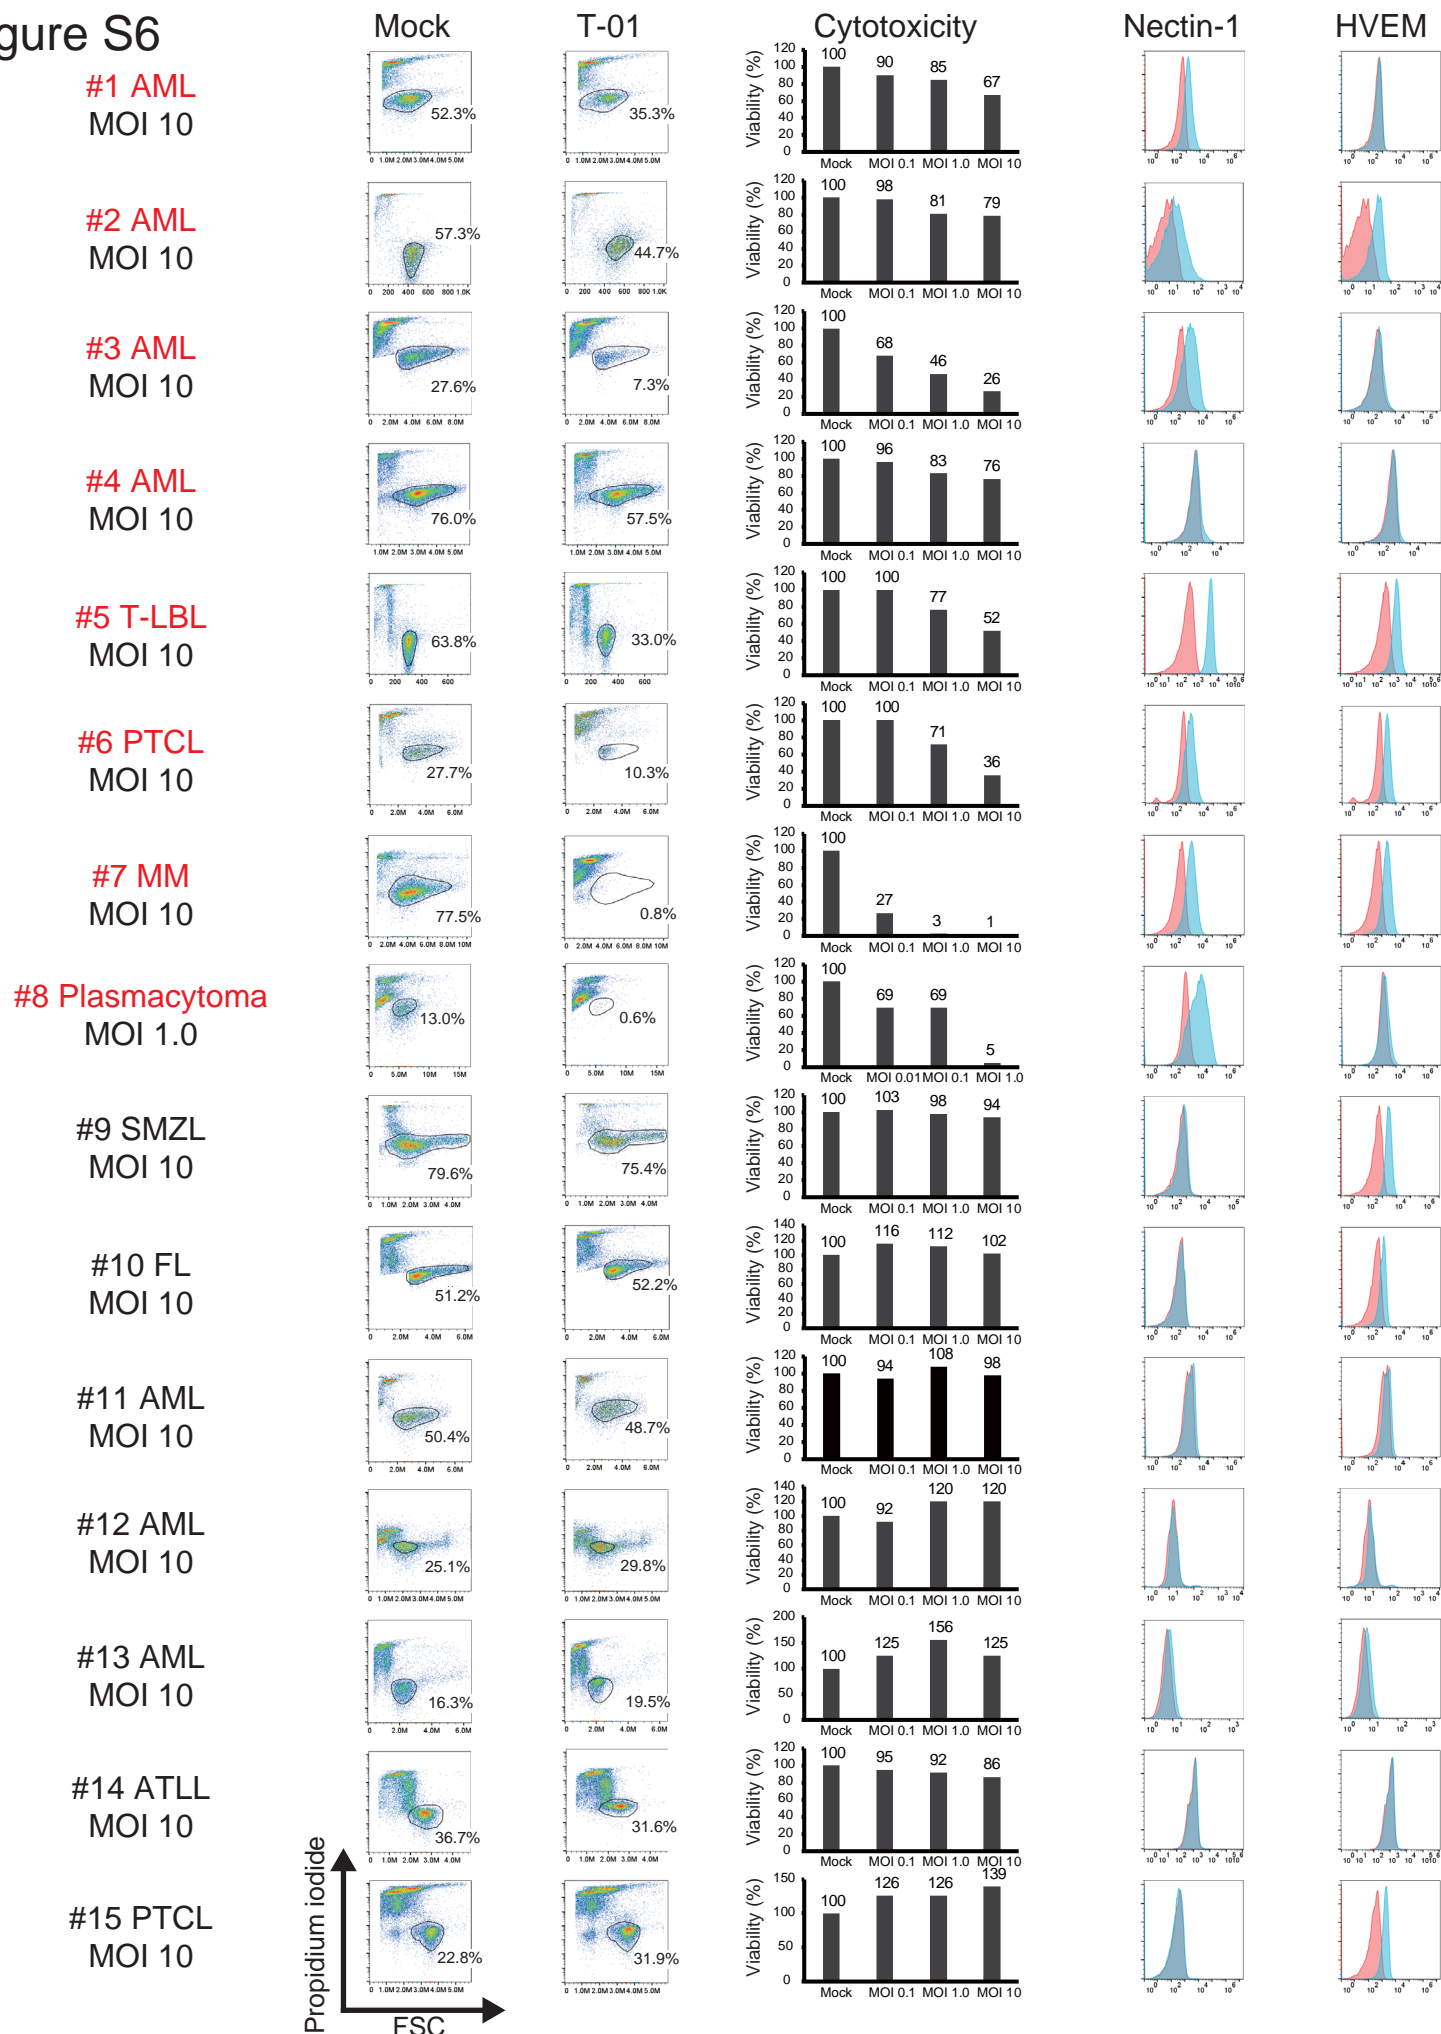

**Figure S6 related to Figure 4. Susceptibility to T-01 and expression of nectin-1 and HVEM on clinical samples.** Mononuclear cells from clinical samples were stained with appropriate combinations of mAbs, based on prior flow cytometric analysis of each clinical sample. Tumor cells within each sample were gated before analysis. Left: dot plots of forward scatter and propidium iodide with gating of viable cells after treatment with mock or T-01 at the indicated MOI for 3 days. Percentages of viable cells are indicated on each plot. The samples regarded as susceptible to T-01 are labeled with red. Middle: viability after treatment with mock or T-01 (MOI 0.1, 1, or 10) for 3 days, calculated as (viable cell percentage with T-01/viable cell percentage with mock) x 100 (%). Right: expression of nectin-1 and HVEM on tumor cells. Red histograms represent cells stained with isotype-matched control mAbs.

Figure S7

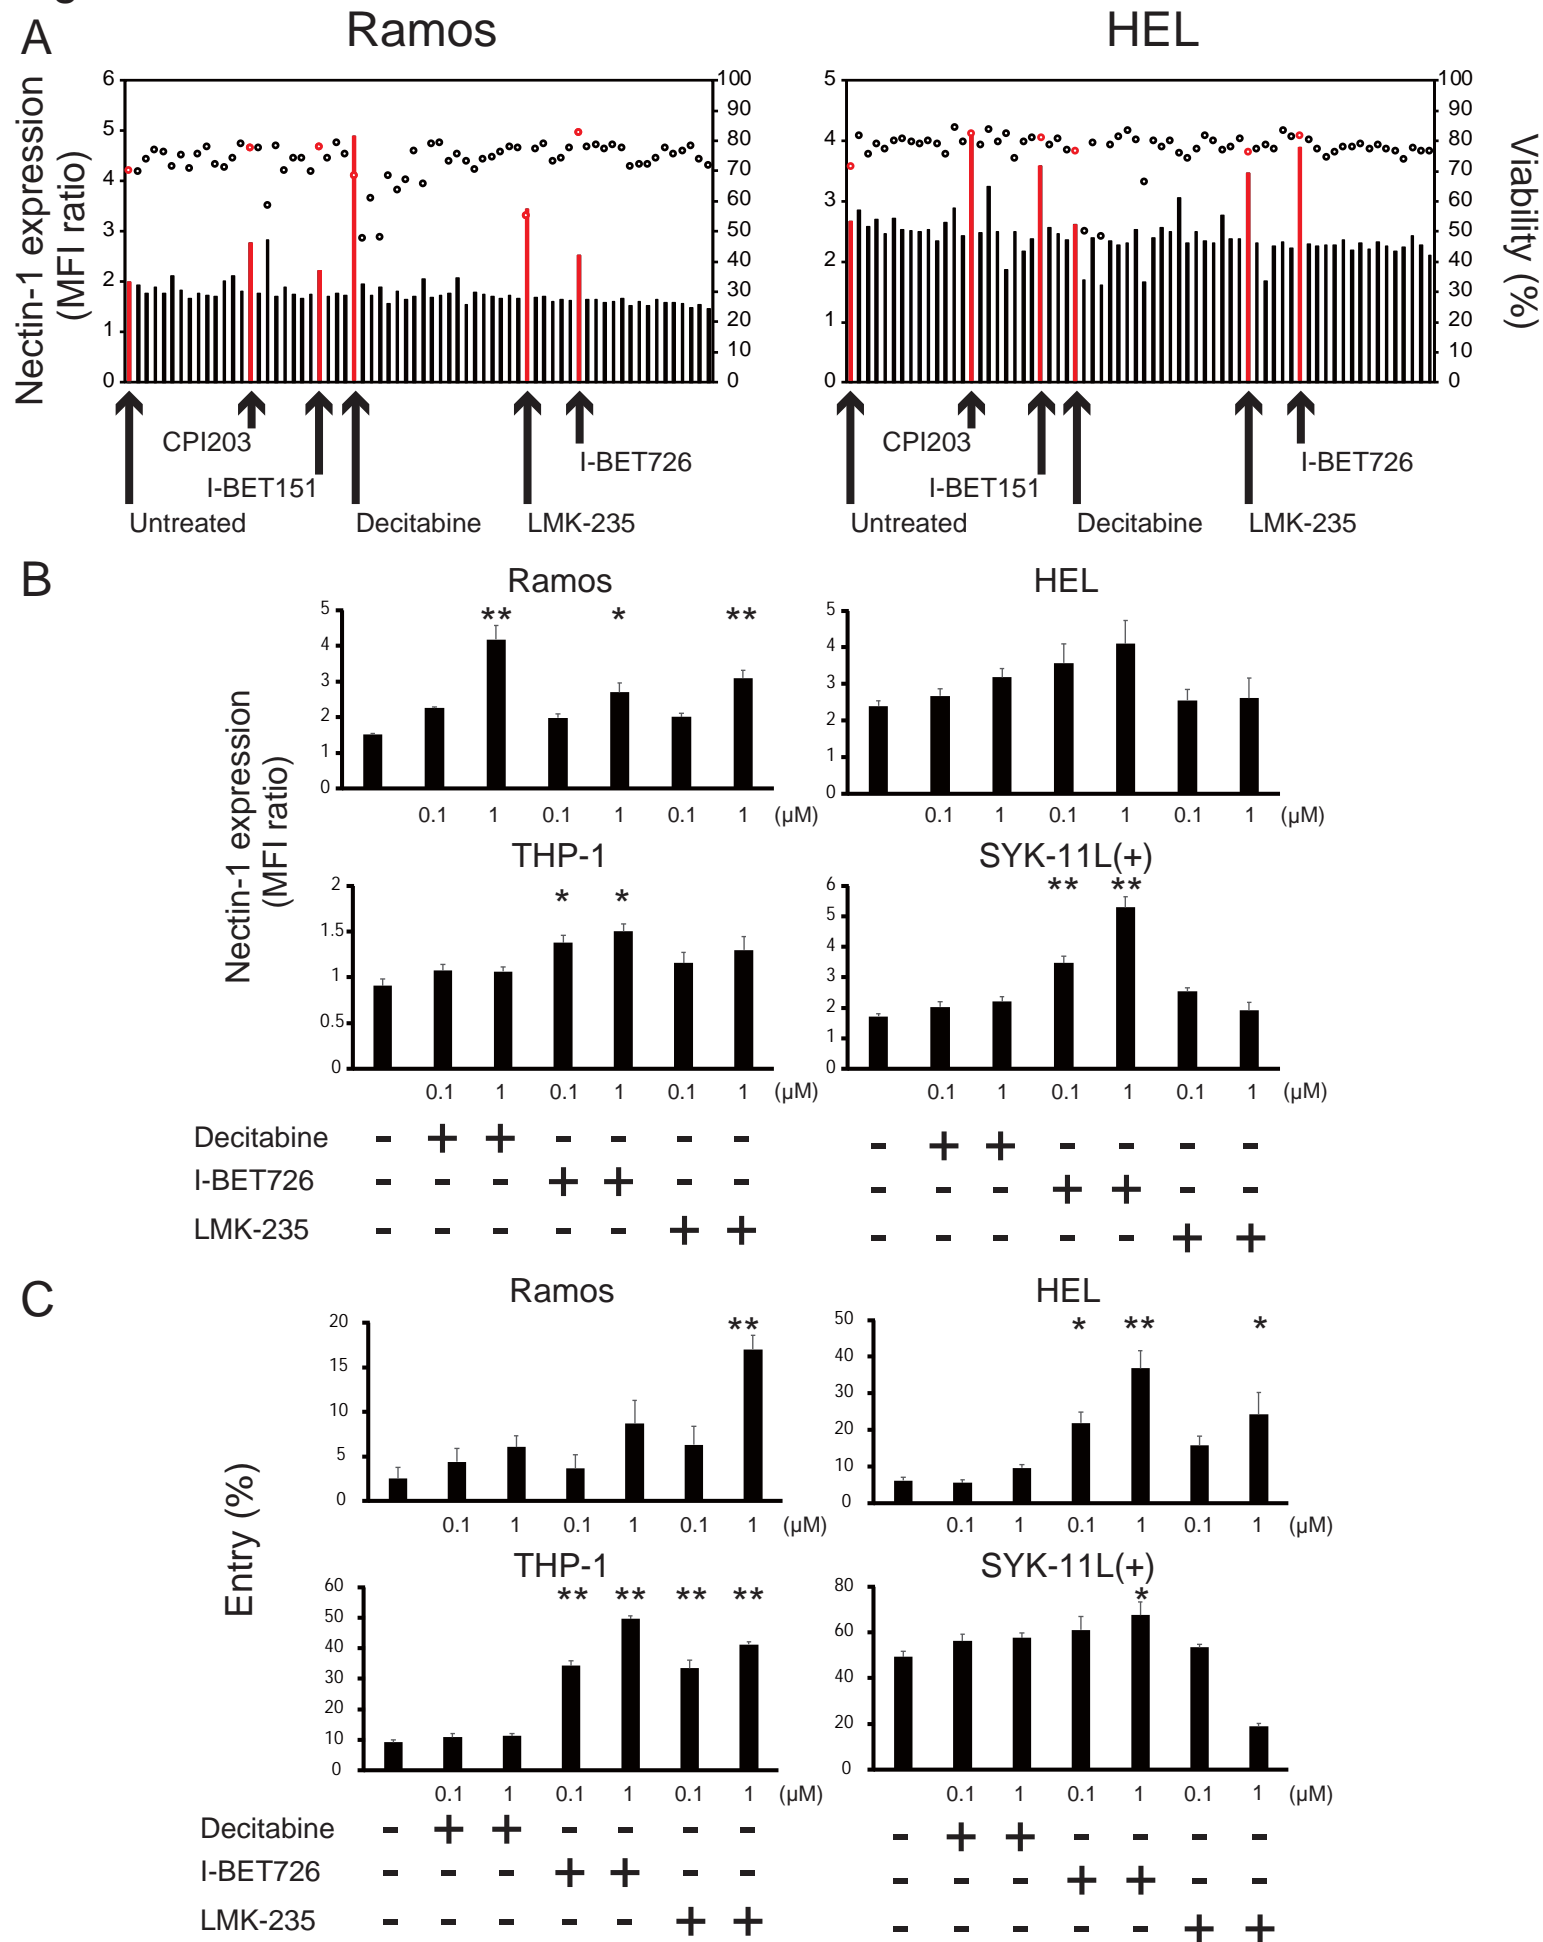

**Figure S7. Nectin-1 expression and viral entry are upregulated by epigenetic regulation.**

(A) Ramos and HEL cells were treated with reagents contained in a chemical library for epigenetics research at 1  $\mu$ M for 24 hours. Nectin-1 expression and cell viability are shown by columns and circles, respectively (in red for the cells treated with the indicated reagents). Nectin-1 expression was detected by flow cytometry. Cell viability was detected as trypan blue exclusion. (B) Ramos, HEL, THP-1, and SYK-11L(+) cells were treated with decitabine, I-BET726, or LMK-235 at the indicated concentrations for 24 hours. Nectin-1 expression was detected by flow cytometry. The data are shown as the mean  $\pm$  SE of 3 independent measurements. (C) Cells were treated with the indicated reagents for 24 hours. Thereafter, the cells were cultured with T-GFP for 4 hours. Viral entry was detected using flow cytometry. The data are shown as the mean  $\pm$  SE of 3 independent measurements. Statistical significance was examined against DMSO-treated control cells. Statistical analysis was conducted using non-repeated measures ANOVA followed by Dunnett's test. \* $P < 0.05$ , \*\* $P < 0.01$ .

Figure S8

A

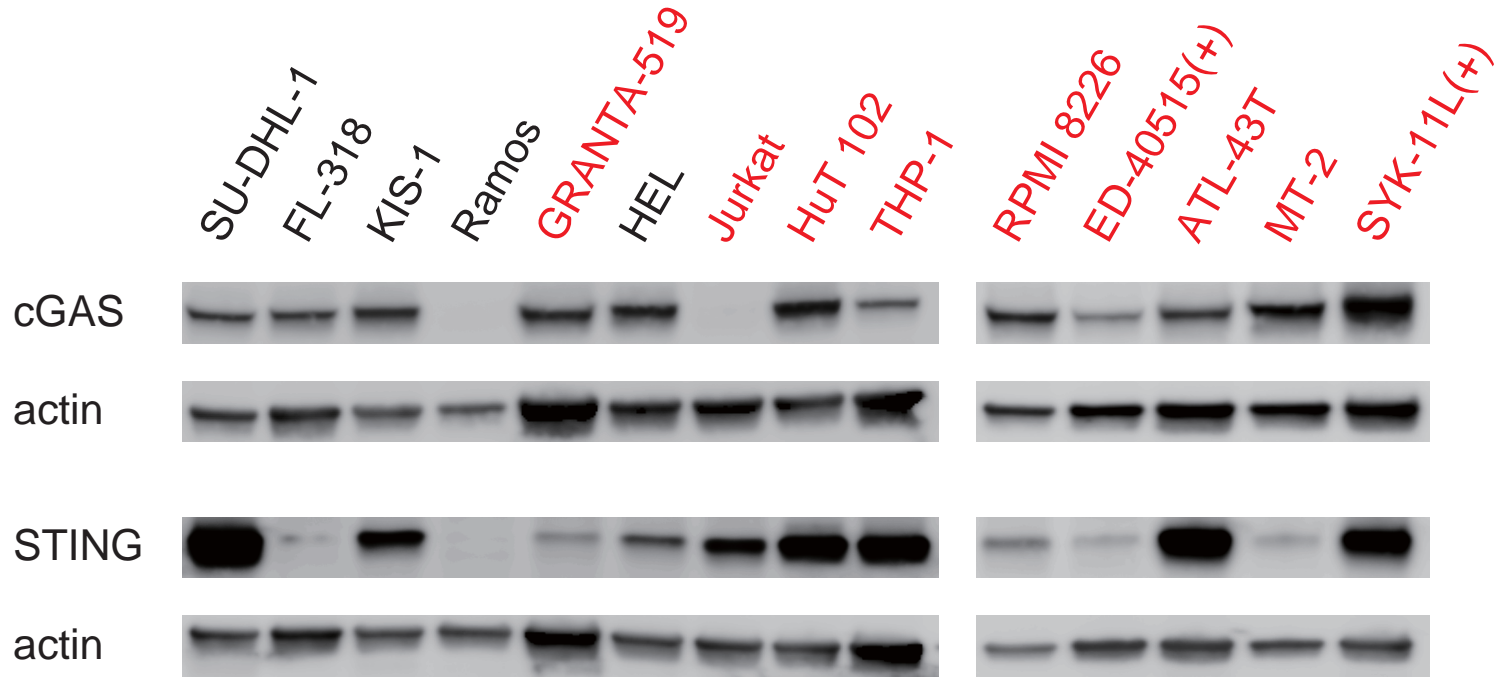

B

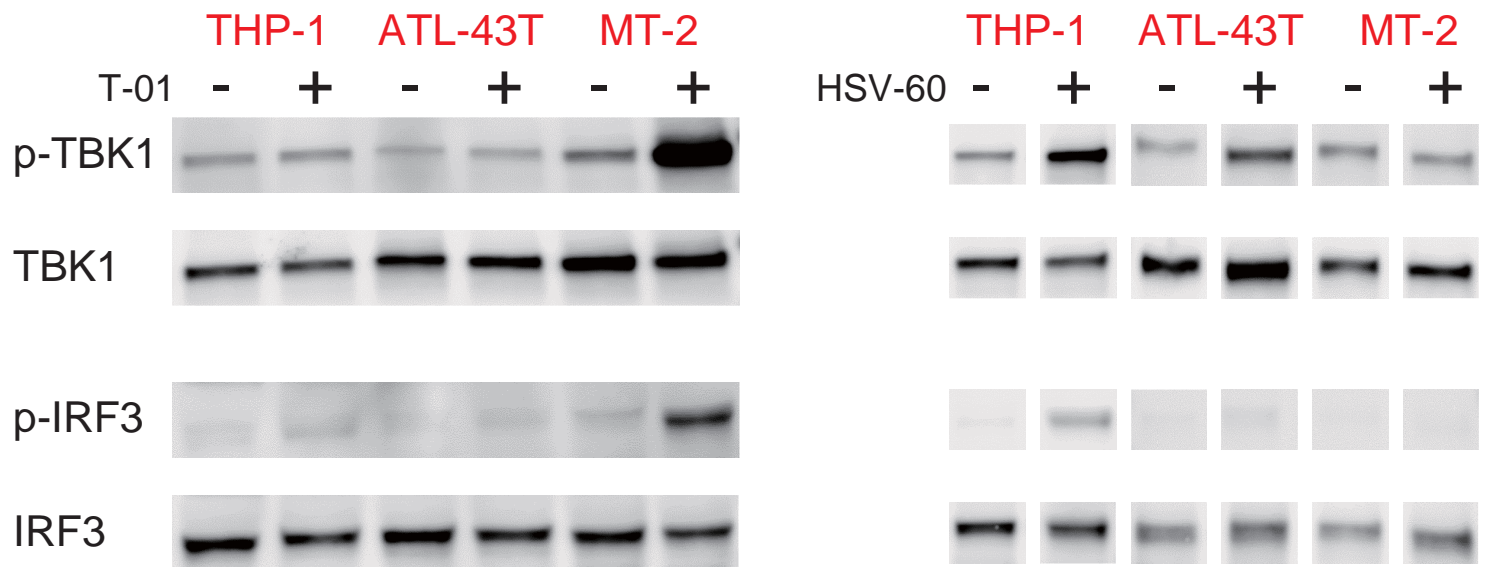

**Figure S8. Expression and activity of the cGAS-STING pathway.**

(A) cGAS, STING, and  $\beta$ -actin in cell extracts were detected by western blotting. The cell lines susceptible to T-01 are labeled with red. (B) Phosphorylated TBK1 (p-TBK1), total TBK1, p-IRF3, and total IRF3 in THP-1, ATL-43T, and MT-2 in cell extracts were detected by western blotting after stimulation with mock or T-01 (MOI 10) for 10 hours (in the left panels) or with DMSO or HSV-60 (10  $\mu$ g/mL) for 3 hours (in the right panels). The cell lines susceptible to T-01 are labeled with red. The data are representative of 3 independent experiments.

Figure S9

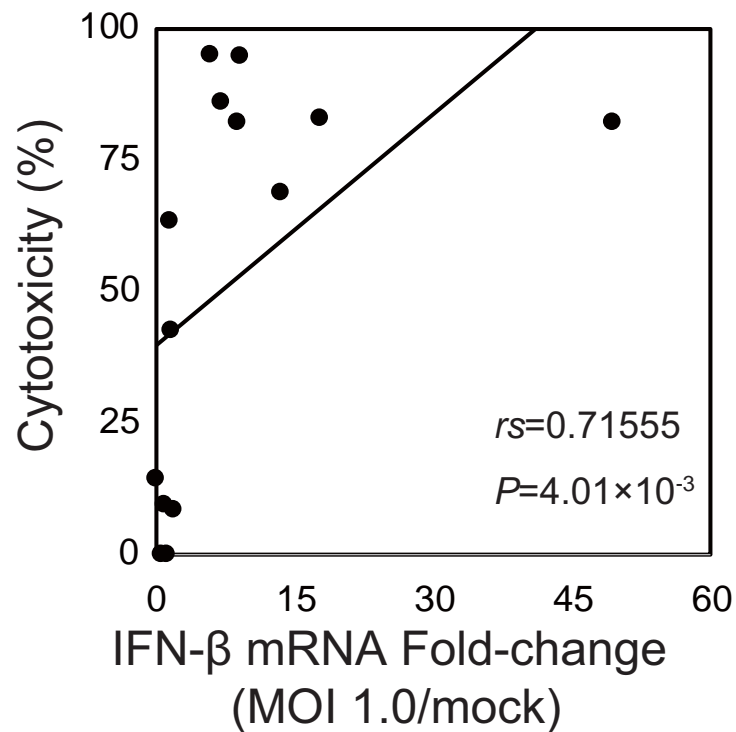

**Figure S9. Correlation between IFN-β mRNA expression and cytotoxicity by T-01.**

The 14 cell lines examined in Figure S8A were infected with T-01 at MOI 1.0 for 24 hours. The expression levels of IFN-β mRNA was measured by quantitative RT-PCR. Cytotoxicity was calculated as  $1 - (\text{viable cell number with T-01} / \text{viable cell number with mock}) \times 100$  (%) after treatment with T-01 (MOI 1.0) for 3 days. Statistical analysis was conducted using Spearman' s correlation.

Figure S10

A

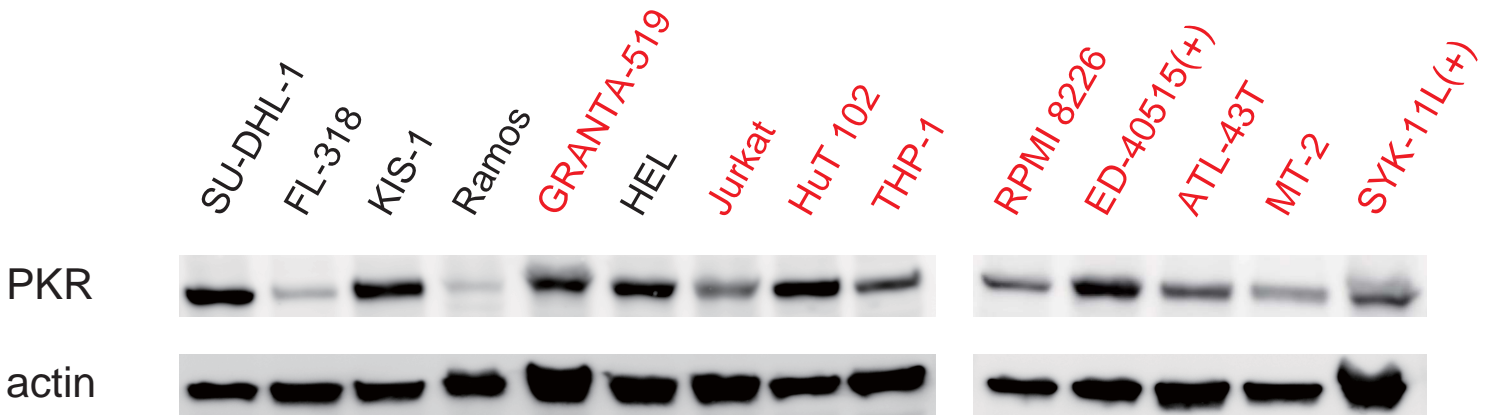

B

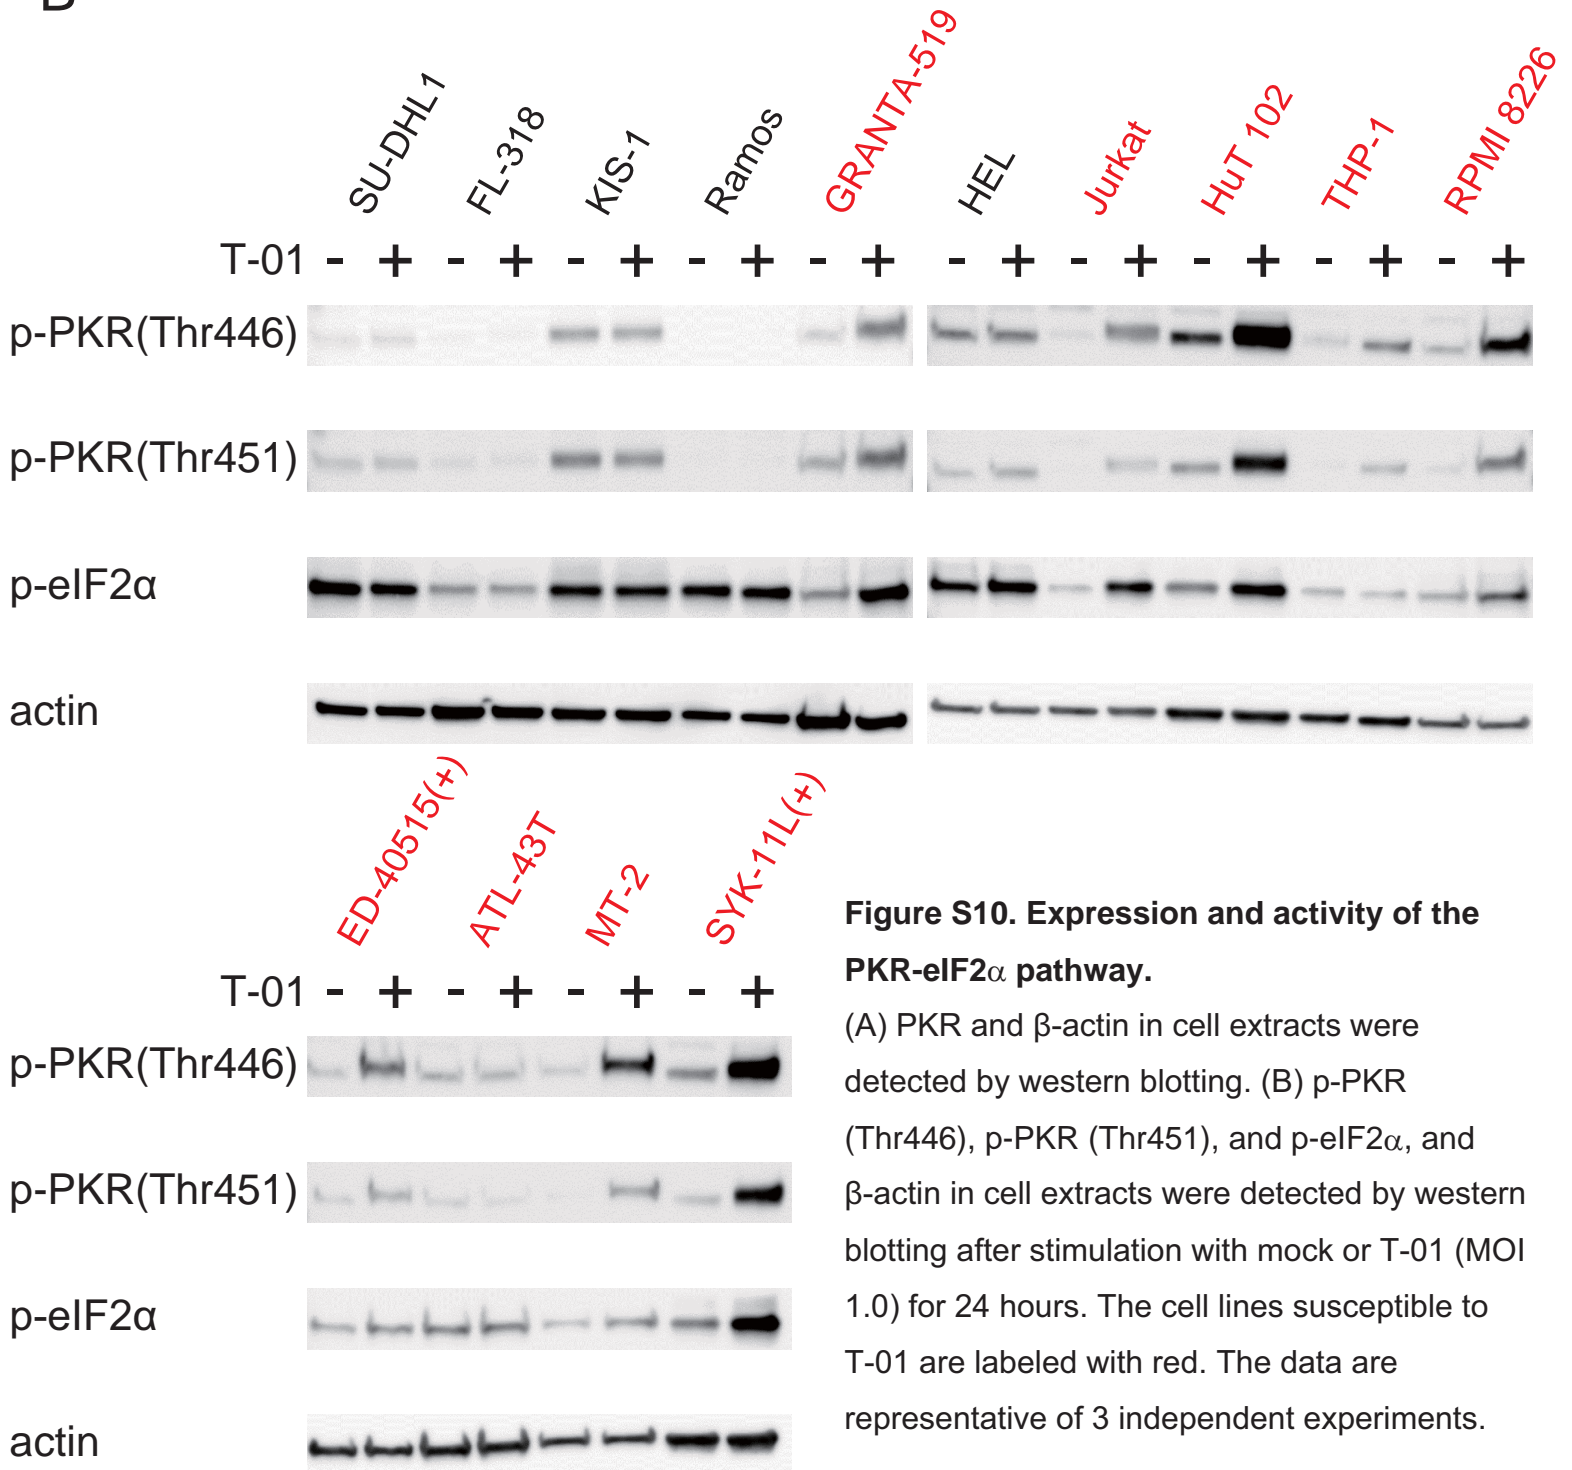

**Figure S10. Expression and activity of the PKR-eIF2 $\alpha$  pathway.**

(A) PKR and  $\beta$ -actin in cell extracts were detected by western blotting. (B) p-PKR (Thr446), p-PKR (Thr451), and p-eIF2 $\alpha$ , and  $\beta$ -actin in cell extracts were detected by western blotting after stimulation with mock or T-01 (MOI 1.0) for 24 hours. The cell lines susceptible to T-01 are labeled with red. The data are representative of 3 independent experiments.



**Table S1 related to Figure 1. Human cell lines of hematological malignancies**

| Cell line       | Origin                          | Source       | Cytotoxicity |
|-----------------|---------------------------------|--------------|--------------|
| Myeloid-derived |                                 |              |              |
| THP-1           | Acute monocytic leukemia        | JCRB         | +            |
| SET-2           | Acute megakaryoblastic leukemia | K.Shimoda    | +            |
| SKM-1           | Acute myeloid leukemia          | JCRB         | +            |
| MEG-01          | Chronic myeloid leukemia        | ATCC         | +            |
| HEL             | Acute erythroid leukemia        | JCRB         | -            |
| HL-60           | Acute promyelocytic leukemia    | ATCC         | -            |
| CHRF-288-11     | Acute megakaryoblastic leukemia | K. Shimoda   | -            |
| T cell-derived  |                                 |              |              |
| Jurkat          | Acute T-cell leukemia           | K. Imada     | +            |
| ATL-43T         | Adult T-cell leukemia           | M. Maeda     | +            |
| SYK-11L(+)      | Adult T-cell leukemia           | K. Imada     | +            |
| ED-40515(+)     | Adult T-cell leukemia           | M. Maeda     | +            |
| MT-2            | Adult T-cell leukemia           | K. Imada     | +            |
| HuT 102         | Adult T-cell leukemia           | M. Nishikori | +            |
| SU-DHL-1        | Anaplastic large cell lymphoma  | M. Nishikori | -            |
| SR-786          | Anaplastic large cell lymphoma  | M. Nishikori | -            |
| B cell-derived  |                                 |              |              |
| GRANTA-519      | Mantle cell lymphoma            | M. Nishikori | +            |
| Raji            | Burkitt lymphoma                | M. Nishikori | +            |
| KM-H2           | Hodgkin lymphoma                | M. Nishikori | +            |
| RPMI 8226       | Plasma cell myeloma             | JCRB         | +            |
| KMS-12-BM       | Plasma cell myeloma             | JCRB         | +            |
| MM.1S           | Plasma cell myeloma             | ATCC         | +            |
| NCI-H929        | Plasmacytoma                    | ATCC         | +            |
| U266            | Plasmacytoma                    | ATCC         | +            |
| Ramos           | Burkitt lymphoma                | M. Nishikori | -            |
| FL-318          | Diffuse large B-cell lymphoma   | M. Nishikori | -            |
| KIS-1           | Diffuse large B-cell lymphoma   | M. Nishikori | -            |

ATCC: American Type Culture Collection

JCRB: Japanese Collection of Research Bioresources Cell Bank

Cytotoxicity : with (+) or without (-) statistically significant cytotoxicity with MOI 0.01, 0.1, or 1.0 of T-01, as shown in Figure S1

**Table S2 related to Figure 4. Clinical samples**

| Patient # | Disease      | Age | Sex | Sample  | Cytotoxicity | Nectin-1 | HVEM |
|-----------|--------------|-----|-----|---------|--------------|----------|------|
| Relapsed  |              |     |     |         |              |          |      |
| 1         | AML          | 62  | M   | PB      | +            | +        | -    |
| 2         | AML          | 68  | F   | PB      | +            | +        | +    |
| 3         | AML          | 78  | F   | PB      | +            | +        | -    |
| 4         | AML          | 85  | M   | PB      | +            | +        | -    |
| 5         | T-LBL        | 31  | M   | PB      | +            | +        | +    |
| 6         | PTCL         | 77  | M   | Ascites | +            | +        | +    |
| 7         | MM           | 68  | F   | Ascites | +            | +        | +    |
| 8         | Plasmacytoma | 69  | M   | PE      | +            | +        | -    |
| 9         | SMZL         | 52  | M   | Spleen  | -            | -        | +    |
| 10        | FL           | 56  | F   | LN      | -            | -        | +    |
| Untreated |              |     |     |         |              |          |      |
| 11        | AML          | 67  | F   | BM      | -            | -        | +    |
| 12        | AML          | 83  | M   | BM      | -            | -        | -    |
| 13        | AML          | 89  | M   | BM      | -            | -        | -    |
| 14        | ATLL         | 65  | F   | PB      | -            | -        | -    |
| 15        | PTCL         | 76  | F   | PE      | -            | -        | +    |

AML: acute myeloid leukemia; T-LBL: T-lymphoblastic leukemia; PTCL: peripheral T-cell lymphoma; MM: multiple myeloma; SMZL: splenic marginal zone lymphoma; FL: follicular lymphoma; PB: peripheral blood; PE: pleural effusion; LN: lymph node

Cytotoxicity positive (+): decrease in viability at MOI 10  $\geq$  20% compared to mock treatment; (-): < 20% compared to mock treatment

Nectin-1, HVEM positive (+): MFI ratio  $\geq$  1.5; negative (-): MFI ratio < 1.5



**Table S3. List of antibodies**

| Reagent                                        | Isotype        | Clone    | Source          | Catalog# |
|------------------------------------------------|----------------|----------|-----------------|----------|
| FITC Mouse IgG1 Isotype                        | Mouse IgG1, k  | MOPC-21  | BD Biosciences  | 555748   |
| FITC anti-human CD38                           | Mouse IgG1, k  | HB7      | BD Biosciences  | 340927   |
| FITC HLA-DR                                    | Mouse IgG2b, k | B8.12.2  | Beckman Coulter | IM0463U  |
| FITC Mouse IgG1 Isotype                        | Mouse IgG1, k  | MOPC-21  | BioLegend       | 400110   |
| FITC Mouse IgG2a Isotype                       | Mouse IgG2a, k | MOPC-173 | BioLegend       | 400208   |
| FITC Mouse IgG2b, k Isotype Ctrl               | Mouse IgG2b, k | MPC-11   | BioLegend       | 400309   |
| FITC anti-human CD117(c-kit)                   | Mouse IgG1, k  | 104D2    | BioLegend       | 313231   |
| FITC anti-human CD19                           | Mouse IgG1, k  | HIB19    | BioLegend       | 302206   |
| FITC anti-human CD138                          | Mouse IgG1, k  | MI15     | BioLegend       | 356508   |
| FITC anti-human CD3                            | Mouse IgG2a, k | HIT3a    | BioLegend       | 300305   |
| FITC anti-human CD14                           | Mouse IgG2a, k | M5E2     | BioLegend       | 301803   |
| FITC anti-human CD34                           | Mouse IgG2a, k | 561      | BioLegend       | 343603   |
| FITC anti-human CD45RO                         | Mouse IgG2a, k | UCHL1    | BioLegend       | 304242   |
| FITC anti-human CD4                            | Mouse IgG2b, k | OKT4     | BioLegend       | 317408   |
| Goat anti-mouse IgG(H&L),FITC conjugate        | Goat IgG       |          | Thermo Fisher   | A24525   |
| PE Mouse IgG1 Isotype                          | Mouse IgG1, k  | 679.1Mc7 | Beckman Coulter | A07796   |
| PE anti-human CD117                            | Mouse IgG1, k  | 104D2D1  | Beckman Coulter | IM2732   |
| PE Mouse IgG1, k Isotype Ctrl(FC)              | Mouse IgG1, k  | MOPC-21  | BioLegend       | 400113   |
| PE anti-human CD111(Nectin-1)                  | Mouse IgG1, k  | R1.302   | BioLegend       | 340404   |
| PE anti-human CD270(HVEM, TR2)                 | Mouse IgG1, k  | 122      | BioLegend       | 318805   |
| PE anti-human CD3                              | Mouse IgG2a, k | HIT3a    | BioLegend       | 300307   |
| APC Mouse IgG1, k Isotype Ctrl(FC)             | Mouse IgG1, k  | X40      | BD Biosciences  | 340442   |
| APC anti-human CD34                            | Mouse IgG1, k  | 581      | BD Biosciences  | 555824   |
| APC anti-human CD38                            | Mouse IgG1, k  | HB7      | BD Biosciences  | 340439   |
| APC Mouse IgG1, k Isotype Ctrl(FC)             | Mouse IgG1, k  | MOPC-21  | BioLegend       | 400122   |
| APC anti-human CD19                            | Mouse IgG1, k  | HIB19    | BioLegend       | 302212   |
| APC Mouse IgG2a, k Isotype Ctrl                | Mouse IgG2a, k | MOPC-173 | BioLegend       | 400219   |
| APC anti-human CD3                             | Mouse IgG2a, k | HIT3a    | BioLegend       | 300311   |
| APC anti-human CD34                            | Mouse IgG2a, k | 561      | BioLegend       | 343608   |
| Alexa Fluor 488 Mouse IgG1, k Isotype Ctrl(FC) | Mouse IgG1,k   | MOPC-21  | BioLegend       | 400132   |
| Alexa Fluor 488 anti-human CD80                | Mouse IgG1,k   | 2D10     | BioLegend       | 305213   |
| Alexa Fluor 488 Mouse IgG2b, k Isotype Ctrl    | Mouse IgG2b,k  | MPC-11   | BioLegend       | 400329   |
| Alexa Fluor 488 anti-human CD86                | Mouse IgG2b,k  | IT2.2    | BioLegend       | 305413   |
| Myosin IIa Antibody                            | Rabbit IgG     |          | Cell Signaling  | 3403     |
| Myosin IIb XP Rabbit mAb                       | Rabbit IgG     | D8H8     | Cell Signaling  | 8824     |
| Myosin IIc Rabbit mAb                          | Rabbit IgG     | D4A7     | Cell Signaling  | 8189     |
| cGAS Rabbit mAb                                | Rabbit IgG     | D1D3G    | Cell Signaling  | 15102    |
| STING Rabbit mAb                               | Rabbit IgG     | D2P2F    | Cell Signaling  | 13647    |
| PKR                                            | Mouse IgG2b, k | B-10     | Santa Cruz      | sc-6282  |
| Anti-PKR(phospho T446)antibody                 | Rabbit IgG     | E120     | Abcam           | ab32036  |
| Anti-PKR(phospho T451)antibody                 | Rabbit IgG     | EPR2152Y | Abcam           | ab81303  |
| Phospho-eIF2a(Ser51) XP Rabbit mAb             | Rabbit IgG     | D9G8     | Cell Signaling  | 3398     |
| TBK1/NAK Rabbit mAb                            | Rabbit IgG     | D1B4     | Cell Signaling  | 3504     |
| Phospho-TBK1/NAK(Ser172)XP Rabbit mAb          | Rabbit IgG     | D52C2    | Cell Signaling  | 5483     |
| IRF-3(D6I4C)XP Rabbit mAb                      | Rabbit IgG     | D6I4C    | Cell Signaling  | 11904    |
| Phospho-IRF-3(Ser386)XP Rabbit mAb             | Rabbit IgG     | E7J8G    | Cell Signaling  | 37829    |
| Human HMGB1/HMG-1 antibody                     | Mouse IgG2b    | 115603   | R&D systems     | MAB1690  |
| Anti-rabbit IgG,HRP-linked Antibody            | Goat           |          | Cell Signaling  | 7074     |
| Anti-Mouse IgG–Peroxidase antibody             | Rabbit         |          | Sigma-Aldrich   | A9044    |
| Anti-VSV-G tag mAb                             | Mouse          | P5D4     | Abcam           | ab50549  |

## Supplemental Methods

### Cell lines

Cells except for the following cell lines were cultured in RPMI-1640 (Sigma-Aldrich) containing 10% heat-inactivated fetal bovine serum (FBS) (Corning, Corning, NY) and 5 mM HEPES (Nacalai Tesque, Kyoto, Japan). SET-2 cells were cultured in DMEM (Sigma-Aldrich) containing 10% FBS, 10  $\mu$ M 2-mercaptoethanol (Fujifilm Wako), and MEM non-essential amino acid solution (Fujifilm Wako). CHR288-11 and HL-60 cells were cultured in IMDM (Fujifilm Wako) containing 10% and 20% FBS, respectively. ED-40515(+), ATL-43T, and SYK-11L(+) cells were cultured in RPMI-1640 containing 10% FBS, 5mM HEPES, and 8 U/mL human IL-2 (BioLegend). Vero and HEK293T cells were cultured in DMEM containing 10% FBS.

### Plasmids and transfection

Human nectin-1 shRNA (#245117), control shRNA (#246995), human nectin-1 expression (#281558), and pLX304 control (#25890) lentiviral vector plasmids were purchased from Dharmacon (Lafayette, CO). QIAprep Spin Miniprep Kit (Qiagen) was used for purification of the plasmid. Approximately 24 hours before transfection, HEK293T cells ( $5 \times 10^5$ ) were seeded into 6-well culture plates in 2 mL growth medium (DMEM + 10% FBS) and incubated at 37 °C, 5% CO<sub>2</sub> overnight. When cells were about 85–95% confluent, half of the medium was replaced. Transfection of DNA mixture of packing plasmids and lentivirus vectors was performed by using Lipofectamine 3000 (Thermo Fisher) according to the manufacturer's instructions. About 16-20 hours after transfection, the transfection medium was replaced with 2 mL fresh complete growth medium (high glucose DMEM + 10% FBS) and cells were incubated at 37 °C for additional 48 hours. Thereafter, lentiviral supernatants were harvested and centrifuged at 1600g, 4 °C for 10 min. The supernatant was stored in -80°C until used. Cell lines (Jurkat, THP-1, Ramos, and E.G7-OVA) were infected by adding half the volume with the lentiviral supernatants plus polybrene (Nacalai Tesque) at a 5  $\mu$ g/mL final concentration. The infected cells were incubated for 24 hours and then given fresh growth media for 24–48 hours before beginning selection. The infected cells were propagated in medium containing 10  $\mu$ g/mL puromycin (InvivoGen, San Diego, CA) or 10  $\mu$ g/mL blasticidin S (Fujifilm Wako).

### Detection of 3-OS HS

After blocking with 5% human IgG and 1% goat serum for 15 min on ice, cells were stained with a vesicular stomatitis virus (VSV)-tagged single chain variable fragment antibody (HS4C3) that recognizes 3-O-sulfated oligosaccharide structures<sup>1</sup> for 30 min on ice. After washing, cells were stained with mouse anti-VSV-G tag mAb (Abcam, Cambridge, UK) for 30 min on ice, followed by staining with FITC-conjugated goat anti-mouse IgG (H+L) (Thermo Fisher) for 30 min on ice. Negative control cells were stained by omitting HS4C3. Cells were analyzed by flow cytometry.

### **Western blotting**

Equal numbers of cells were resolved on SDS-PAGE (Criterion™ TGX™). Trans-Blot Turbo™ Transfer System was used for the transfer of proteins to PVDF membranes (all reagents from Bio-Rad, Hercules, CA). The membrane was blocked in 5% Difco™ skim milk (BD Biosciences) or 5% bovine serum albumin (Roche Diagnostics, Rotkreuz, Switzerland). The signal was detected using an ImageQuant LAS-4010 (GE Healthcare, Chicago, IL). HSV-60 (InvivoGen) was added to cells with Lipofectamine 3000 (Thermo Fisher).

### **Epigenetic regulation**

A chemical library for epigenetics research (containing 80 compounds) was purchased from Sigma-Aldrich (S990043-EPI1). Decitabine, I-BET 726, and LMK-235 were purchased from Selleck (Houston, TX) and dissolved in DMSO. Cells were seeded in a 96-well plate at  $1 \times 10^5$  cells per well, and each compound was added at the indicated concentrations. After incubation for 24 hours, cells were collected and analyzed.

### **Reverse transcription and real-time PCR for IFN- $\beta$ mRNA**

Total RNA was isolated using an RNeasy Mini Kit (Qiagen). PrimeScript RT Master Mix (Takara Bio Inc., Kusatsu, Japan) was used for cDNA synthesis. The samples were run on a ViiA7 Real-Time PCR System (Applied Biosystems). Amplification was performed using SYBR Premix Ex Taq II (Takara Bio Inc.) as follows: 95°C for 30 seconds followed by 40 cycles of 95°C for 5 seconds and 60°C for 30 seconds. All the experiments were performed in triplicate. RPL13A was used as an endogenous control. The  $\Delta\Delta C_t$  method was used to quantify the relative amount of mRNA in each sample in comparison with the control. Primer sequences used were: RPL13A (forward: 5'-TGTTGGACTTTCCACCTG-3', reverse: 5'-AACCCCTTGGTTGTGC-3'), IFN- $\beta$  (forward: 5'-CGACACTGTTCGTGTTGTCA-3', reverse: 5'-GAAGCACAACAGGAGAGCAA-3')

### **Animal experiments**

Four-week-old female SCID Beige mice were purchased from Charles River Laboratories Japan, Inc. and were used in experiments at five weeks of age. GRANTA-519 or ED-40515(+) cells ( $5 \times 10^6$ ) in a mixture of 50  $\mu$ L of RPMI-1640 without serum and 50  $\mu$ L of Matrigel (BD Biosciences) were implanted subcutaneously into the left flank.<sup>2</sup> When tumors reached about 5 mm in diameter, mice were randomized, and T-01 ( $2 \times 10^5$  or  $1 \times 10^6$  pfu) or mock in 20 $\mu$ L PBS containing 10% glycerol was injected into the tumors on days 0 and 3. The mice were killed when the maximum diameter of tumors exceeded 20 mm. The tumor size was measured using Vernier calipers every 2 or 3 days. The tumor volume was calculated using the formula  $1/2 \times [\text{long axis}] \times [\text{short axis}]^2$ .

Four-week-old female C57BL/6 mice were purchased from Charles River Laboratories Japan, Inc. and were used in experiments at five weeks of age. E.G7-OVA-nectin-1 cells ( $1 \times 10^6$ ) in a mixture of 50  $\mu$ L of RPMI-1640 without serum and 50  $\mu$ L of Matrigel were implanted subcutaneously into the right and left flanks.<sup>2</sup> When tumors reached about 5 mm in diameter, mice were randomized, and T-01 ( $2 \times 10^6$  pfu) or mock in 20  $\mu$ L PBS containing 10% glycerol was injected into the right-side tumors on days 0 and 3. The mice were killed 10 days after the second injection of T-01 or mock, and TILs and spleen cells were isolated. The cells were stained with FITC-conjugated rat anti-mouse CD8 mAb, biotinylated and streptavidin-PE-bound H-2K<sup>b</sup> OVA tetramer or negative (SIY) tetramer (MBL), and 7-aminoactinomycin D (BioLegend). OVA tetramer<sup>+</sup>CD8<sup>+</sup> T cells were detected by flow cytometry.

### Supplemental References

1. ten Dam, G.B., Kurup, S., van de Westerlo, E.M.A., Versteeg, E.M.M., Lindahl, U., Spillmann, D., et al. (2006). 3-O-Sulfated Oligosaccharide Structures Are Recognized by Anti-heparan Sulfate Antibody HS4C3. *J. Biol. Chem.* 281, 4654-4662.
2. Mezencev, R., and McDonald, J.F. (2011). Subcutaneous xenografts of human T-lineage acute lymphoblastic leukemia Jurkat cells in nude mice. *In Vivo* 25, 603-607.
